# Supplementary material
Source: PubMed Central journal article supplement (PMC6355545)

### Supplementary figure legends

**Figure S1.** Patient flow diagram. CDI: *Clostridium difficile* infection; EIA: enzyme-immunoassay; GDH: glutamate dehydrogenase; PCR: polymerase chain reaction

**Figure S2.** ROC curves for recurrence according to the different predictive models (PCR Ct with pre-specified high sensitivity cut-off value of >95%).

**Figure S3.** ROC curves for poor outcome according to the different predictive models (PCR Ct with pre-specified high sensitivity cut-off value of >95%).

**Figure S4.** ROC curves for recurrence according to the different predictive models (with the cut-off value suggested by Senchyna *et al* for PCR Ct <26.35).

**Figure S5.** ROC curves for poor outcome according to the different predictive models (with the cut-off value suggested by Senchyna *et al* for PCR Ct <26.35).

**Figure S1.** Patient flow diagram. CDI: *Clostridium difficile* infection; EIA: enzyme-immunoassay; GDH: glutamate dehydrogenase; PCR: polymerase chain reaction.

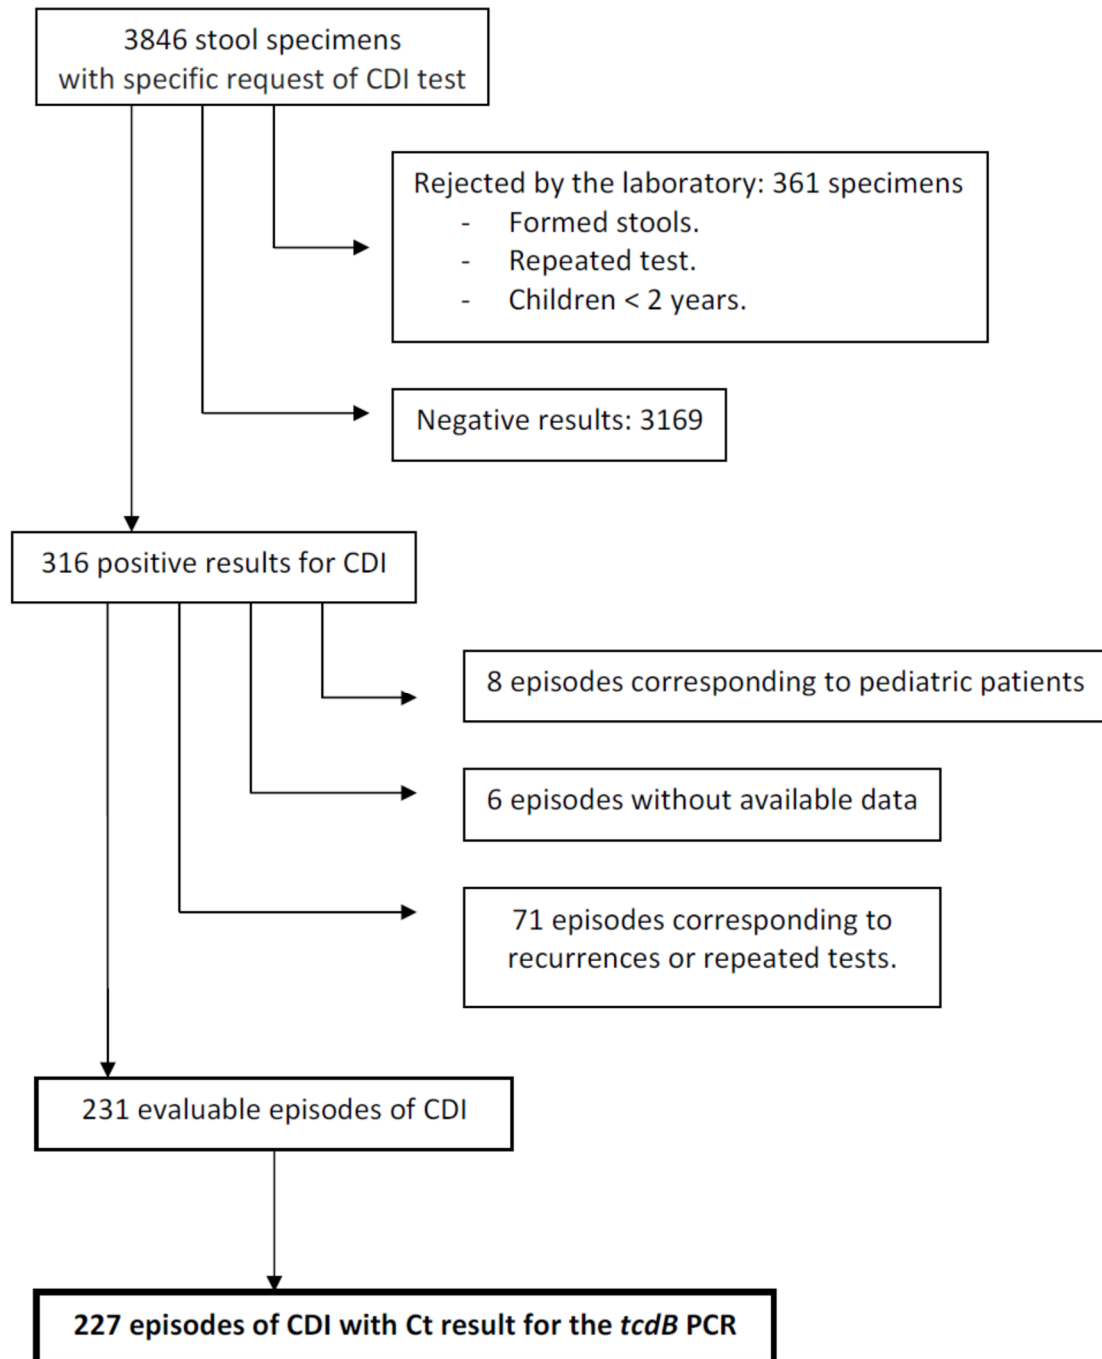

**Table S1.** Multivariate model to predict recurrence of CDI including PCR Ct with pre-specified high sensitivity cut-off value of >95%.

|                                                                 | Clinical model + Toxin B Ct PCR |                     |                         |              |
|-----------------------------------------------------------------|---------------------------------|---------------------|-------------------------|--------------|
|                                                                 | No recurrence (n = 191)         | Recurrence (n = 36) | OR (95%CI)              | P-value      |
| Chronic renal failure [n (%)]                                   | 29 (15.2)                       | 10 (27.8)           | <b>2.89 (1.14-7.36)</b> | <b>0.025</b> |
| Number of admissions [median (IQR)]                             | 1 (0-1)                         | 1 (0-2)             | <b>1.41 (1.09-1.83)</b> | <b>0.009</b> |
| Severity of symptoms at presentation of CDI: Severe CDI [n (%)] | 27 (14.1)                       | 13 (36.1)           | <b>3.19 (1.32-7.71)</b> | <b>0.010</b> |
| CDI-symptoms as the main reason for consultation [n (%)]        | 84 (44.0)                       | 23 (63.9)           | <b>2.27 (1.00-5.14)</b> | <b>0.049</b> |
| Positive EIA result for A/B toxin [n (%)]                       | 77 (40.3)                       | 27 (75.0)           |                         |              |
| <b>Toxin B Ct &lt;29.35 [n (%)]</b>                             | 149 (78.0)                      | 35 (97.2)           | 7.19 (0.93-55.53)       | 0.058        |

**Figure S2.** ROC curves for recurrence according to the different predictive models (PCR Ct with pre-specified high sensitivity cut-off value of >95%).

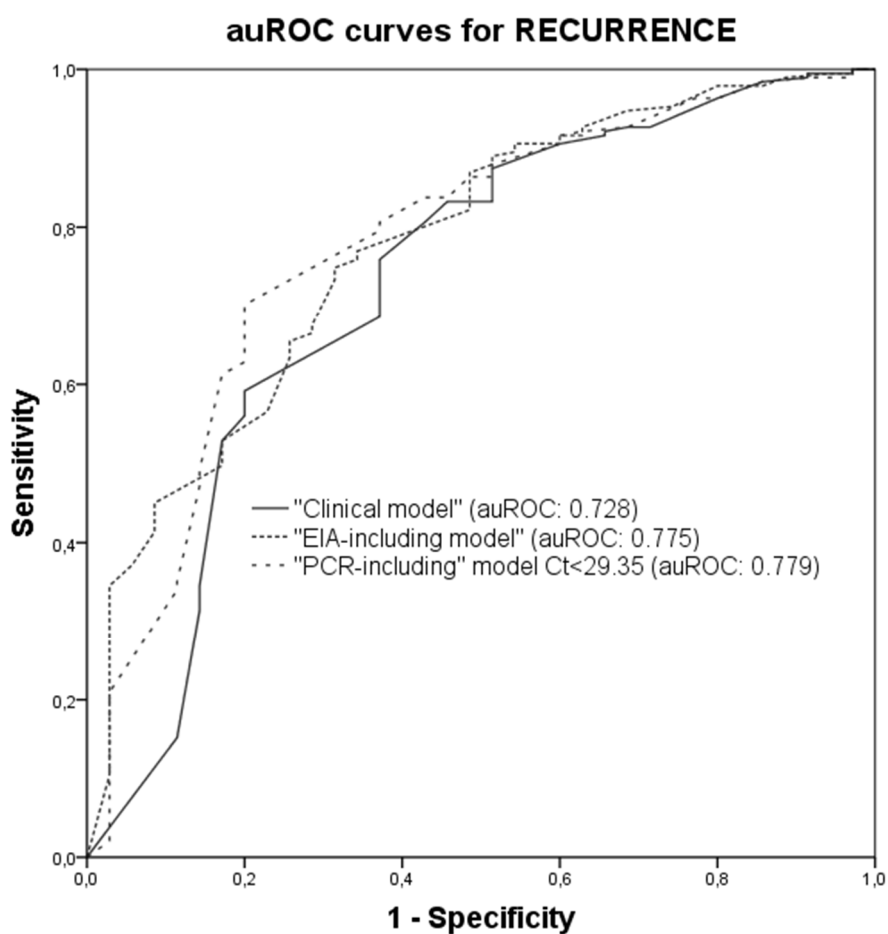

**Table S2.** Multivariate model to predict poor outcome of CDI including PCR Ct pre-specified high sensitivity cut-off value of >95%.

|                                                              | Clinical model                |                          |                           |              |
|--------------------------------------------------------------|-------------------------------|--------------------------|---------------------------|--------------|
|                                                              | Not poor outcome<br>(n = 157) | Poor outcome<br>(n = 70) | OR (95%CI)                | P-value      |
| Male gender [n (%)]                                          | 81 (51.6)                     | 26 (37.1)                | 1.52 (0.78-2.96)          | 0.21         |
| CCI [median (IQR)]                                           | 4.0 (1.0 – 6.0)               | 5.5 (4.0 – 7.0)          | 1.09 (0.98-1.21)          | 0.09         |
| Chemotherapy [n (%)]                                         | 12 (7.6)                      | 15 (21.4)                | 1.96 (0.76-5.02)          | 0.16         |
| Inflammatory bowel disease [n (%)]                           | 15 (9.6)                      | 1 (1.4)                  | <b>0.08 (0.01-0.7)</b>    | <b>0.02</b>  |
| Solid organ transplantation [n (%)]                          | 19 (12.1)                     | 2 (2.9)                  | <b>0.18 (0.04-0.92)</b>   | <b>0.04</b>  |
| CDI-symptoms as the main reason for consultation [n (%)]     | 68 (43.3)                     | 39 (55.7)                | <b>3.16 (1.55-6.46)</b>   | <b>0.002</b> |
| Maximum number of daily bowel movements [median (IQR)]       | 5.0 (3.0 – 7.0)               | 6.0 (4.0 – 8.25)         | 1.07 (0.97-1.18)          | 0.18         |
| Concomitant antibiotic during CDI specific treatment [n (%)] | 97 (61.8)                     | 61 (87.1)                | <b>4.54 (1.88 – 10.9)</b> | <b>0.001</b> |
| <b>Toxin B Ct &lt;34.25 [n (%)]</b>                          | 152 (96.8)                    | 67 (95.7)                | 0.95 (0.19-4.75)          | 0.95         |

**Figure S3.** ROC curves for poor outcome according to the different predictive models (PCR Ct with pre-specified high sensitivity cut-off value of >95%).

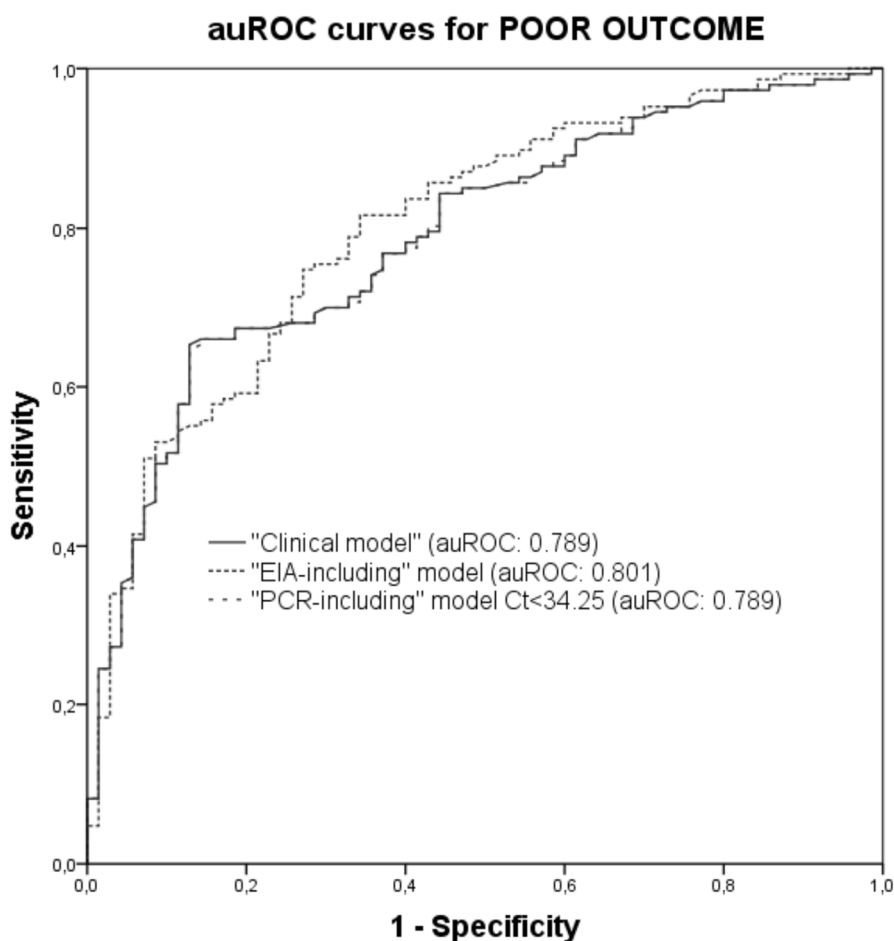

**Table S3.** Multivariate model to predict recurrence of CDI including PCR Ct with the cut-off value suggested by Senchyna et al (PCR Ct <26.35).

|                                                                       | Clinical model + Toxin B Ct PCR |                     |                         |              |
|-----------------------------------------------------------------------|---------------------------------|---------------------|-------------------------|--------------|
|                                                                       | No recurrence (n = 191)         | Recurrence (n = 36) | OR (95%CI)              | P-value      |
| Chronic renal failure [n (%)]                                         | 29 (15.2)                       | 10 (27.8)           | <b>3.17 (1.25-8.05)</b> | <b>0.015</b> |
| Number of admissions <sup>a</sup> [median (IQR)]                      | 1 (0-1)                         | 1 (0-2)             | <b>1.45 (1.13-1.87)</b> | <b>0.003</b> |
| Severity of symptoms at presentation of CDI: Severe CDI [n (%)]       | 27 (14.1)                       | 13 (36.1)           | <b>3.62 (1.5-8.76)</b>  | <b>0.004</b> |
| CDI-symptoms as the main reason for consultation <sup>b</sup> [n (%)] | 84 (44.0)                       | 23 (63.9)           | <b>2.25 (0.99-5.11)</b> | <b>0.052</b> |
| <b>Toxin B Ct &lt;26.35 [n (%)]</b>                                   | 109 (57.1)                      | 28 (77.8)           | <b>2.81 (1.12-7.04)</b> | <b>0.027</b> |

**Figure S4.** ROC curves for recurrence according to the different predictive models (with the cut-off value suggested by Senchyna et al for PCR Ct <26.35).

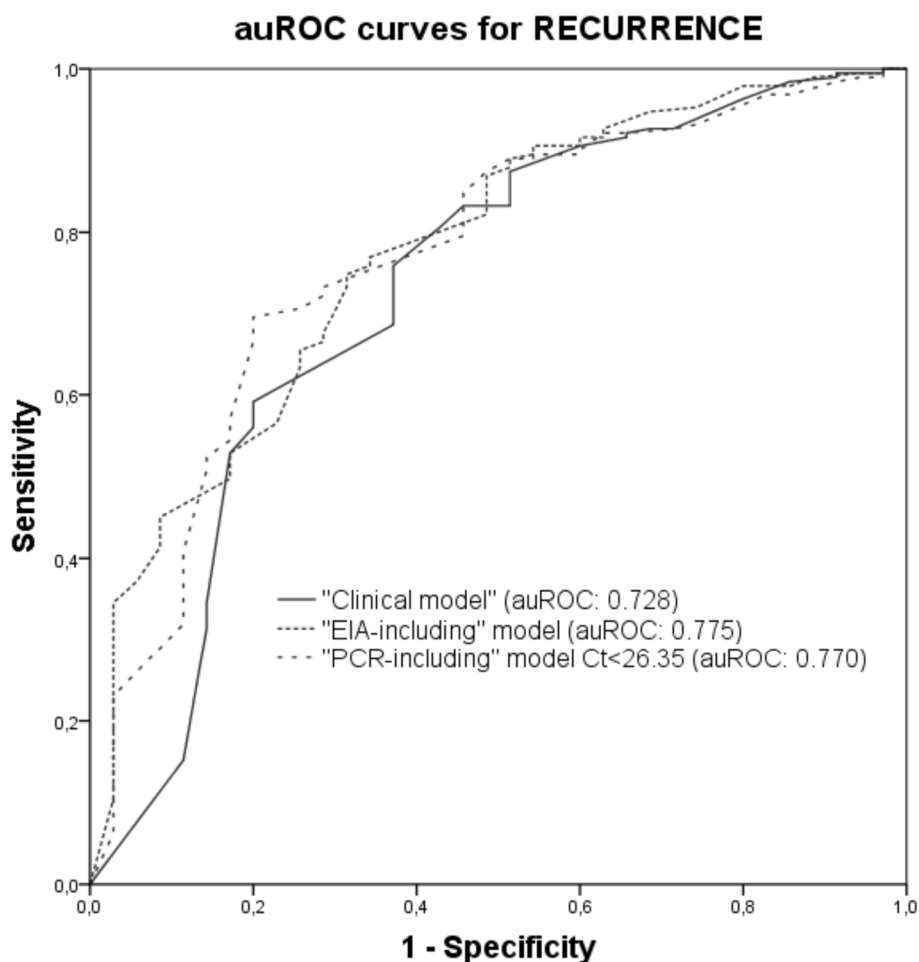

**Table S4.** Multivariate model to predict poor outcome of CDI including PCR Ct with the cut-off value suggested by Senchyna et al (PCR Ct <26.35).

|                                                              | Clinical model                |                          |                          |                  |
|--------------------------------------------------------------|-------------------------------|--------------------------|--------------------------|------------------|
|                                                              | Not poor outcome<br>(n = 157) | Poor Outcome<br>(n = 70) | OR (95%CI)               | P-value          |
| Male gender [n (%)]                                          | 81 (51.6)                     | 26 (37.1)                | 1.47 (0.75-2.9)          | 0.25             |
| CCI [median (IQR)]                                           | 4.0 (1.0 – 6.0)               | 5.5 (4.0 – 7.0)          | 1.09 (0.98-1.21)         | 0.09             |
| Chemotherapy [n (%)]                                         | 12 (7.6)                      | 15 (21.4)                | 2.31 (0.86-6.18)         | 0.09             |
| Inflammatory bowel disease [n (%)]                           | 15 (9.6)                      | 1 (1.4)                  | <b>0.07 (0.01-0.6)</b>   | <b>0.02</b>      |
| Solid organ transplantation [n (%)]                          | 19 (12.1)                     | 2 (2.9)                  | 0.19 (0.03-1.005)        | 0.051            |
| CDI-symptoms as the main reason for consultation [n (%)]     | 68 (43.3)                     | 39 (55.7)                | <b>3.16 (1.52-6.55)</b>  | <b>0.002</b>     |
| Maximum number of daily bowel movements [median (IQR)]       | 5.0 (3.0 – 7.0)               | 6.0 (4.0 – 8.25)         | 1.07 (0.97-1.18)         | 0.19             |
| Concomitant antibiotic during CDI specific treatment [n (%)] | 97 (61.8)                     | 61 (87.1)                | <b>5.2 (2.11 – 12.8)</b> | <b>&lt;0.000</b> |
| <b>Toxin B Ct &lt;26.35 [n (%)]</b>                          | 89 (56.7)                     | 48 (68.6)                | <b>2.18 (1.08-4.4)</b>   | <b>0.029</b>     |

**Figure S5.** ROC curves for poor outcome according to the different predictive models (with the cut-off value suggested by Senchyna et al for PCR Ct <26.35).

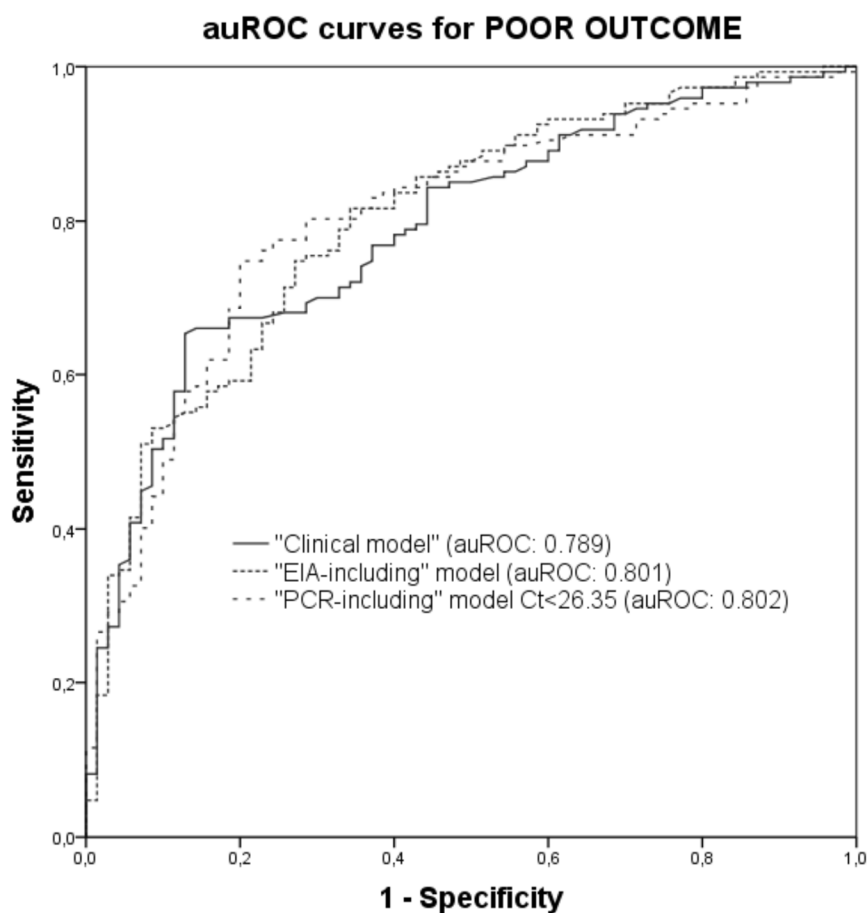

Supplement: eb4aeb2b7abe5451717f5ae3799f6de5_JCM.01125-18-s0001.pdf [file eb4aeb2b7abe5451717f5ae3799f6de5_JCM.01125-18-s0001.pdf]
